# Supplementary figures and images for: Antioxidant Properties of Thymoquinone, Thymohydroquinone and Black Cumin (Nigella sativa L.) Seed Oil: Scavenging of Superoxide Radical Studied Using Cyclic Voltammetry, DFT and Single Crystal X-ray Diffraction
Source: MDPI journal article supplement (doi:10.3390/antiox12030607), 2023-03-01

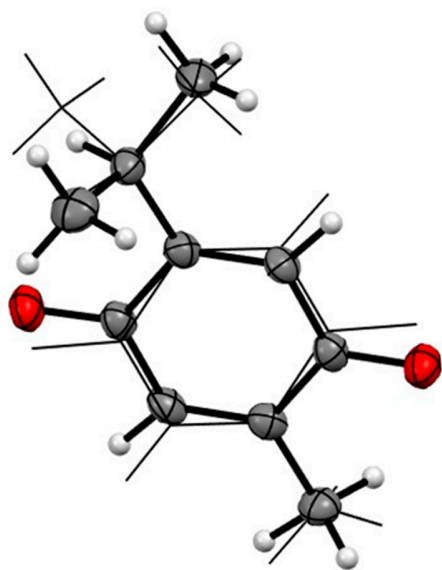

**Figure S1.** Overlay of two thymoquinone molecules in the asymmetric unit.

Supplement: s1 [file s1]
